# Supplementary material for: Click-enabled tetrazine ionic liquid as an advanced material for chemo-selective gas detection via inverse electron-demand Diels–Alder reaction
Source: Royal Society of Chemistry journal article supplement (doi:10.1039/d5ma01455g), 2026-01-01
Supplement: d5ma01455g1.pdf [file d5ma01455g1.pdf]

**Click-enabled tetrazine ionic liquid as advanced material for chemo-selective gas detection via inverse electron-demand Diels–Alder reaction**

Chien-Yuan Chen, Yu-Hsin Chung, Yu-Qian Qiu, Wen-Chun Su, Wen-Ting Hsiao, and

Yen-Ho Chu\*

Department of Chemistry and Biochemistry, National Chung Cheng University

Chiayi 62102, Taiwan, Republic of China

\* Corresponding author. Tel: 886 52729139; fax: 886 52721040; e-mail: [cheyhc@ccu.edu.tw](mailto:cheyhc@ccu.edu.tw)

<sup>1</sup>H NMR spectrum of 1,4-dihydro-1,2,4,5-tetrazine-3,6-dicarboxylic acid

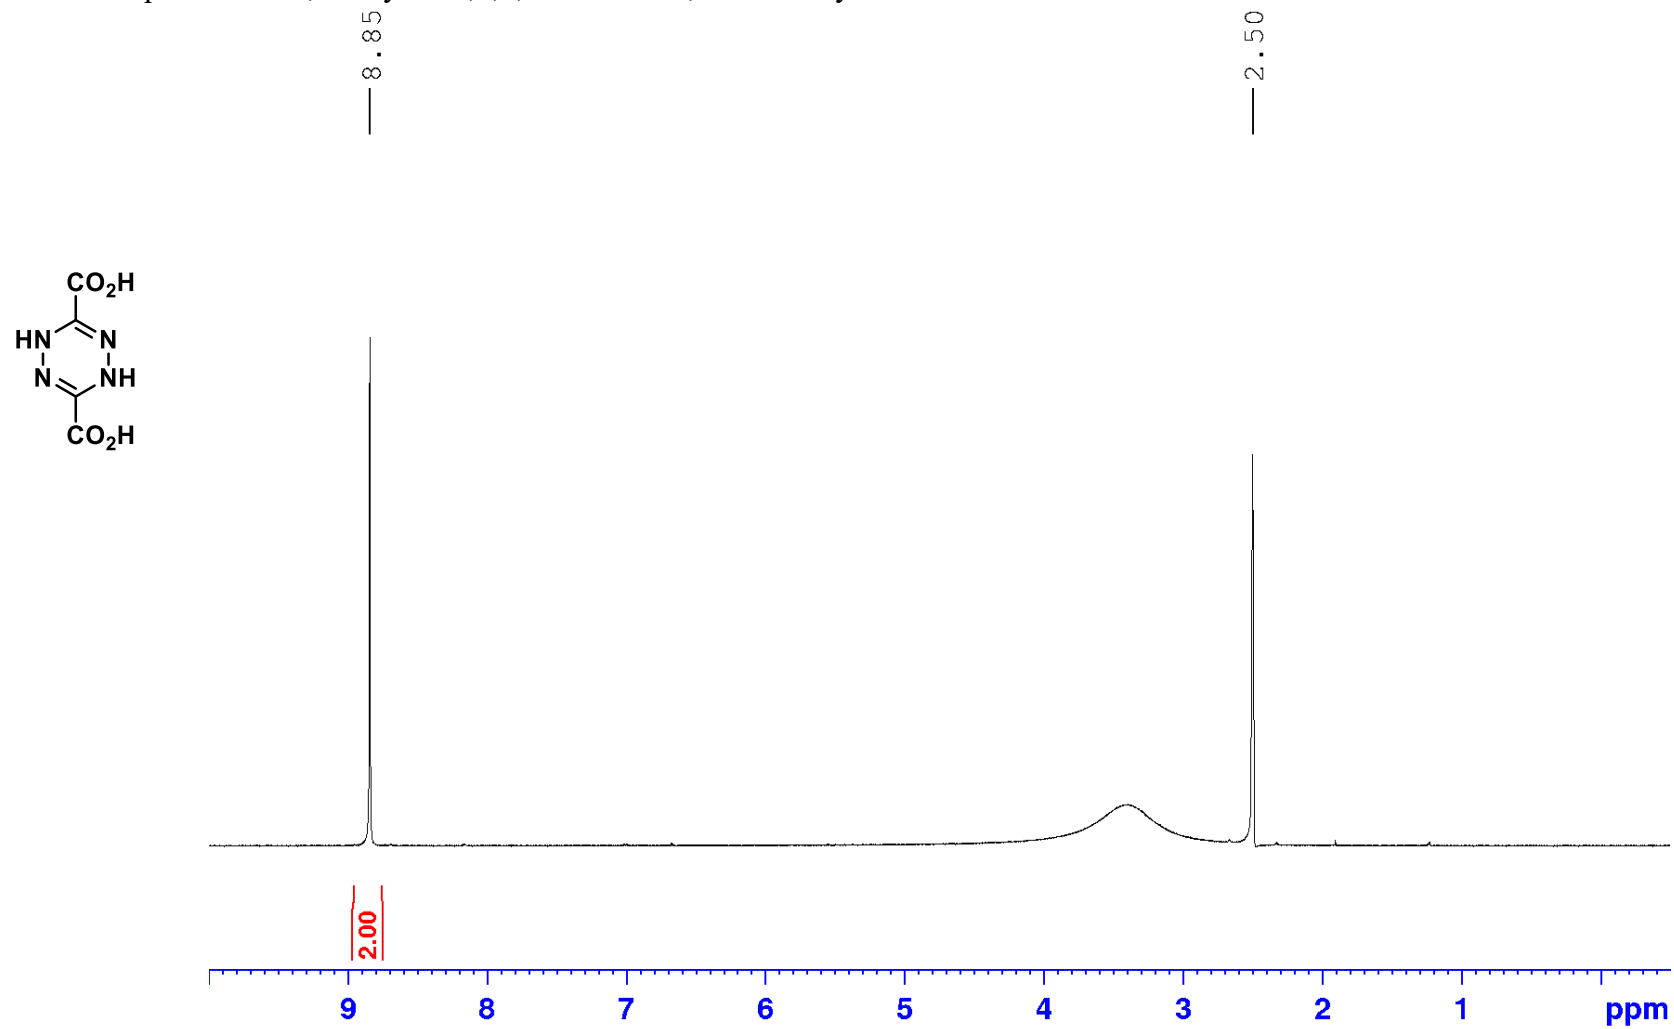

$^{13}\text{C}$  NMR spectrum of 1,4-dihydro-1,2,4,5-tetrazine-3,6-dicarboxylic acid

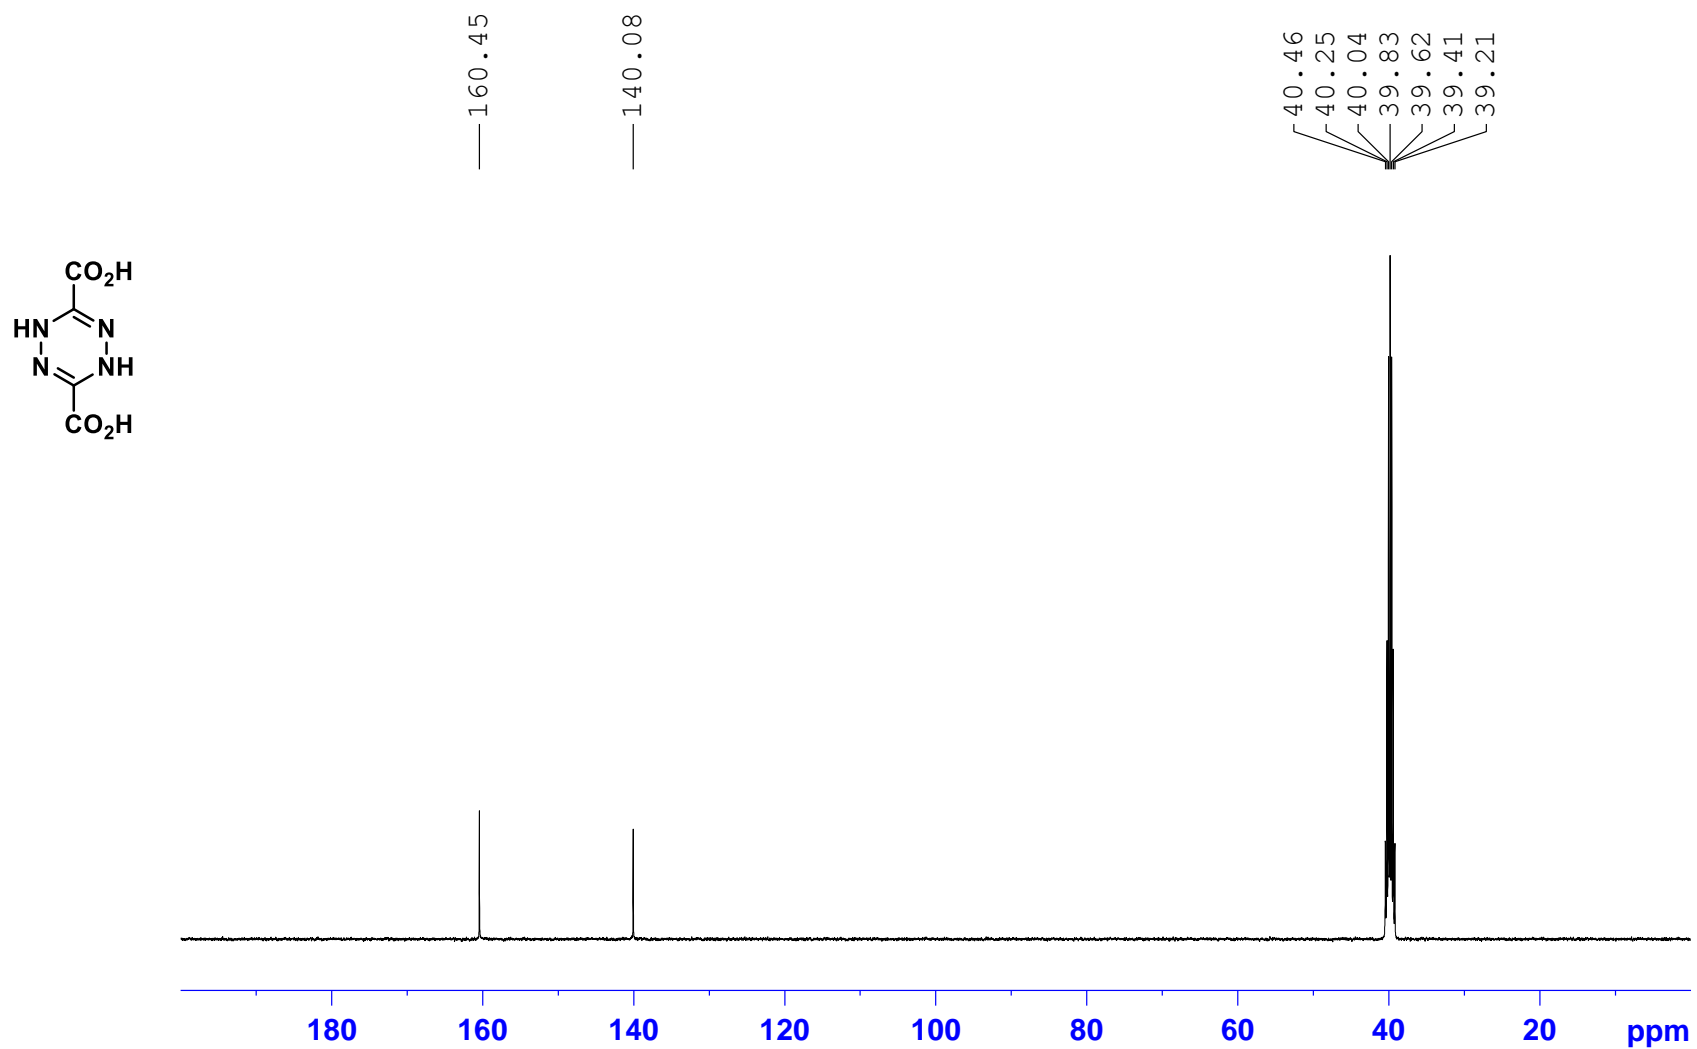

# High-resolution mass spectrum of 1,4-dihydro-1,2,4,5-tetrazine-3,6-dicarboxylic acid

## Elemental Composition Report

Page 1

### Single Mass Analysis

Tolerance = 30.0 PPM / DBE: min = -1.5, max = 100.0

Selected filters: None

Monoisotopic Mass, Even Electron Ions

2 formula(e) evaluated with 1 results within limits (all results (up to 1000) for each mass)

Elements Used:

C: 0-100 H: 0-400 N: 4-4 O: 4-4

20241231\_1\_NEG\_1 235 (4.012)

TOF MS ES-

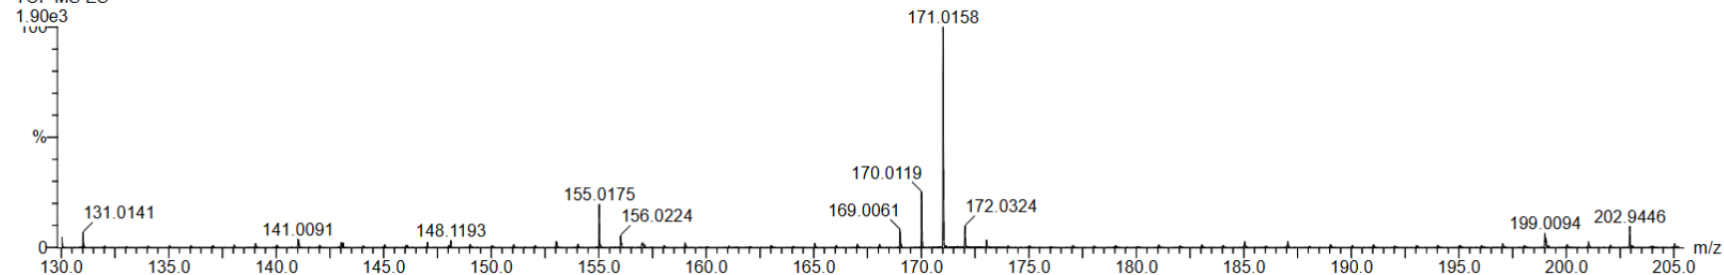

Minimum: -1.5  
Maximum: 5.0 30.0 100.0

| Mass     | Calc. Mass | mDa | PPM | DBE | Formula     |
|----------|------------|-----|-----|-----|-------------|
| 171.0158 | 171.0154   | 0.4 | 2.3 | 5.5 | C4 H3 N4 O4 |

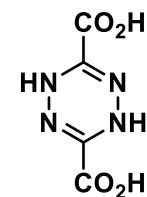

<sup>1</sup>H NMR spectrum of methyl 6-((2-(2-hydroxyethoxy)ethyl)carbamoyl)-1,4-dihydro-1,2,4,5-tetrazine-3-carboxylate

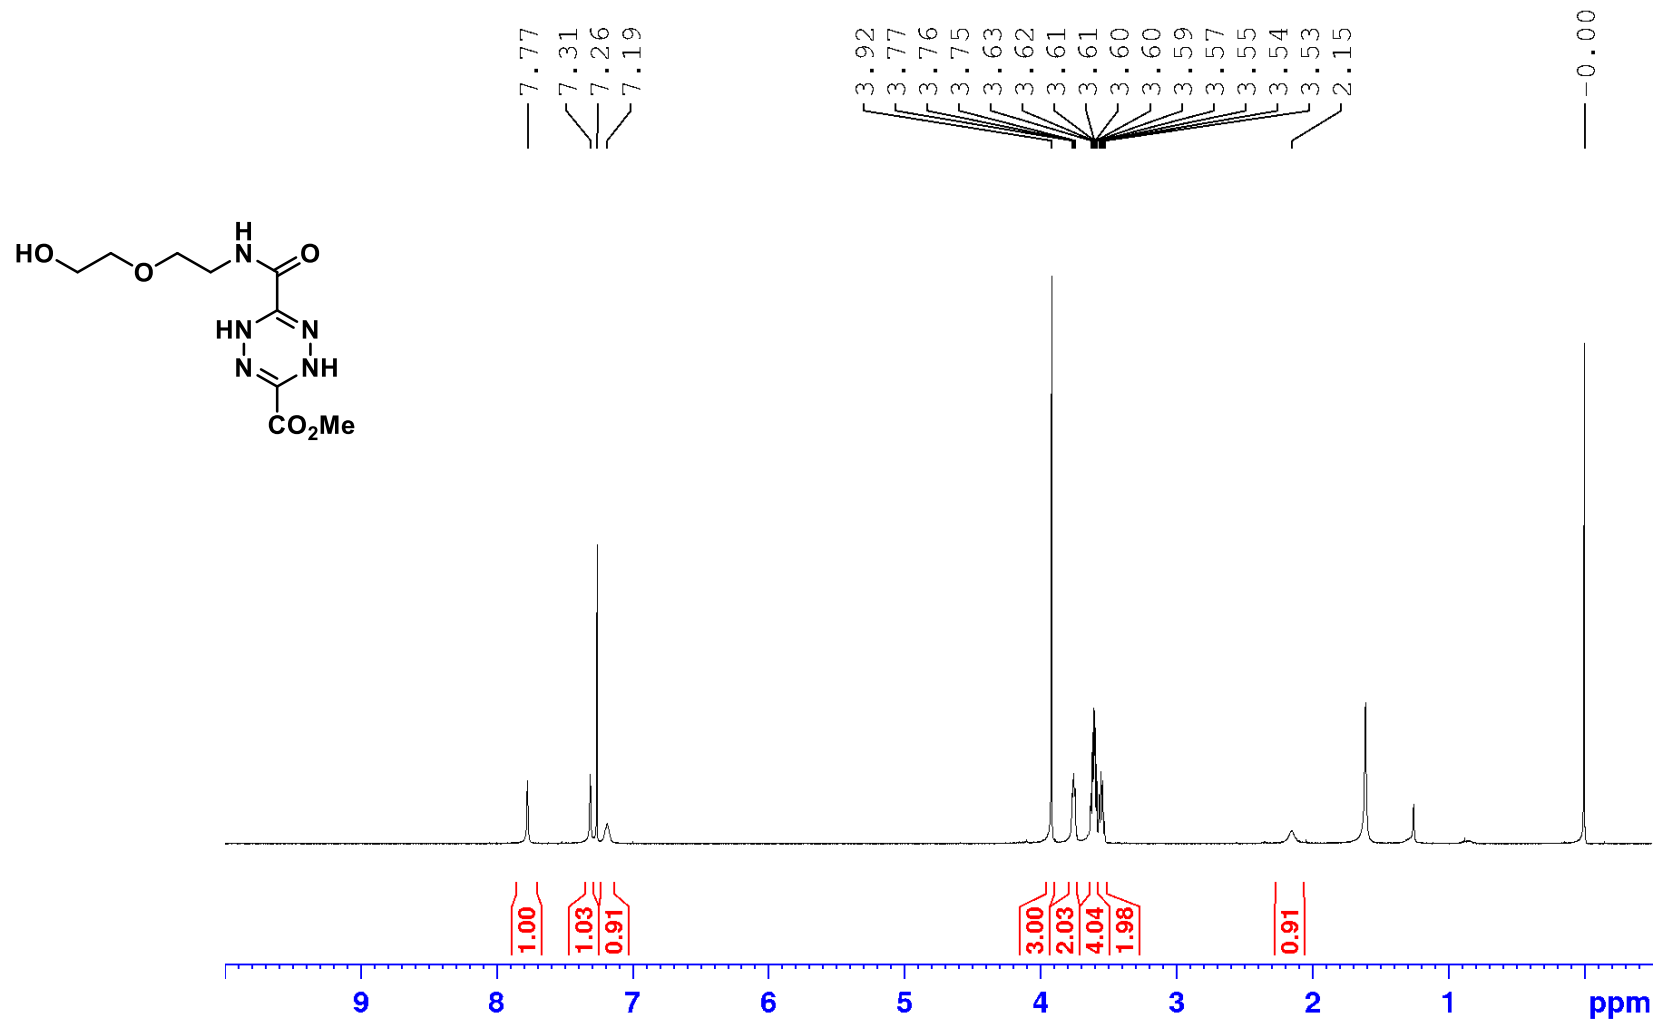

$^{13}\text{C}$  NMR spectrum of methyl 6-((2-(2-hydroxyethoxy)ethyl)carbamoyl)-1,4-dihydro-1,2,4,5-tetrazine-3-carboxylate

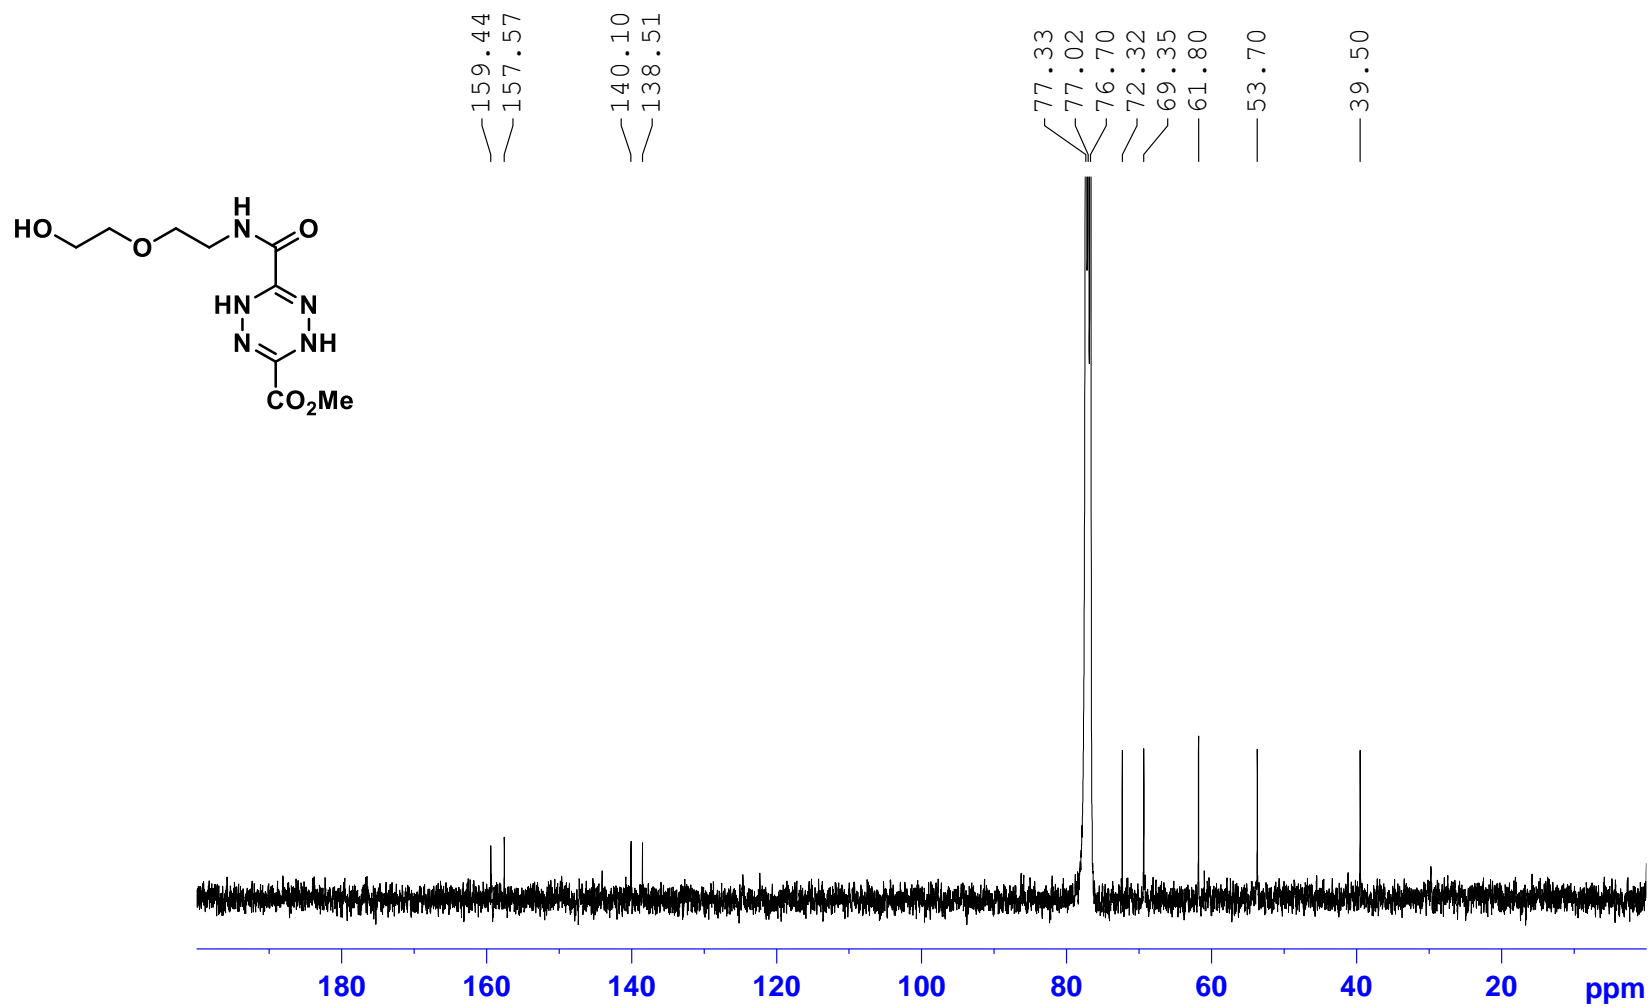

# High-resolution mass spectrum of methyl 6-((2-(2-hydroxyethoxy)ethyl)carbamoyl)-1,4-dihydro-1,2,4,5-tetrazine-3-carboxylate

Spectrum

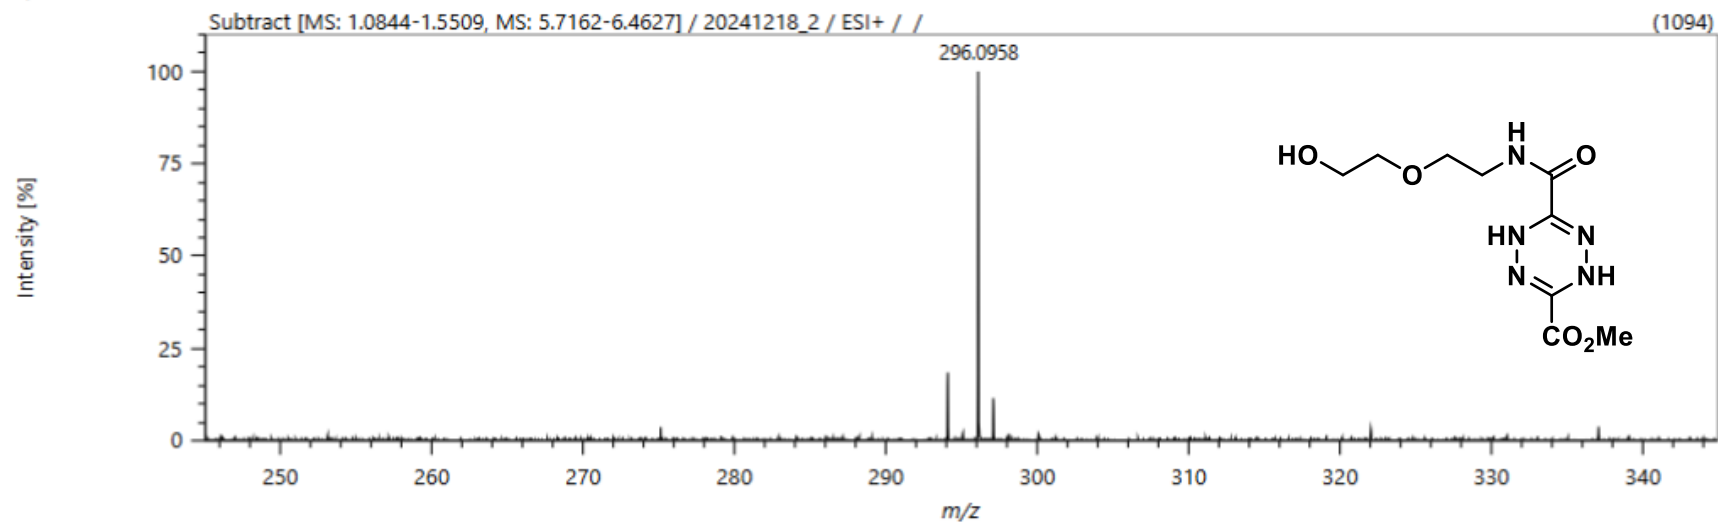

## Elemental Composition

### Parameters

Tolerance:  $\pm 3.00$  ppm  
 Electron: Odd/Even  
 Charge: +1  
 DBE: -99.0 - 999.0

### Elements Set 2:

| Symbol | C   | H    | O | N | Na |
|--------|-----|------|---|---|----|
| Min    | 0   | 0    | 5 | 5 | 1  |
| Max    | 400 | 1000 | 5 | 5 | 1  |

## Results

| Mass      | Formula                                                         | Calculated Mass | Mass Difference [mDa] | Mass Difference [ppm] | DBE |
|-----------|-----------------------------------------------------------------|-----------------|-----------------------|-----------------------|-----|
| 296.09584 | C <sub>9</sub> H <sub>15</sub> N <sub>5</sub> O <sub>5</sub> Na | 296.09654       | -0.70                 | -2.37                 | 4.5 |

$^1\text{H}$  NMR spectrum of [DHTz-3C-im][OMs]

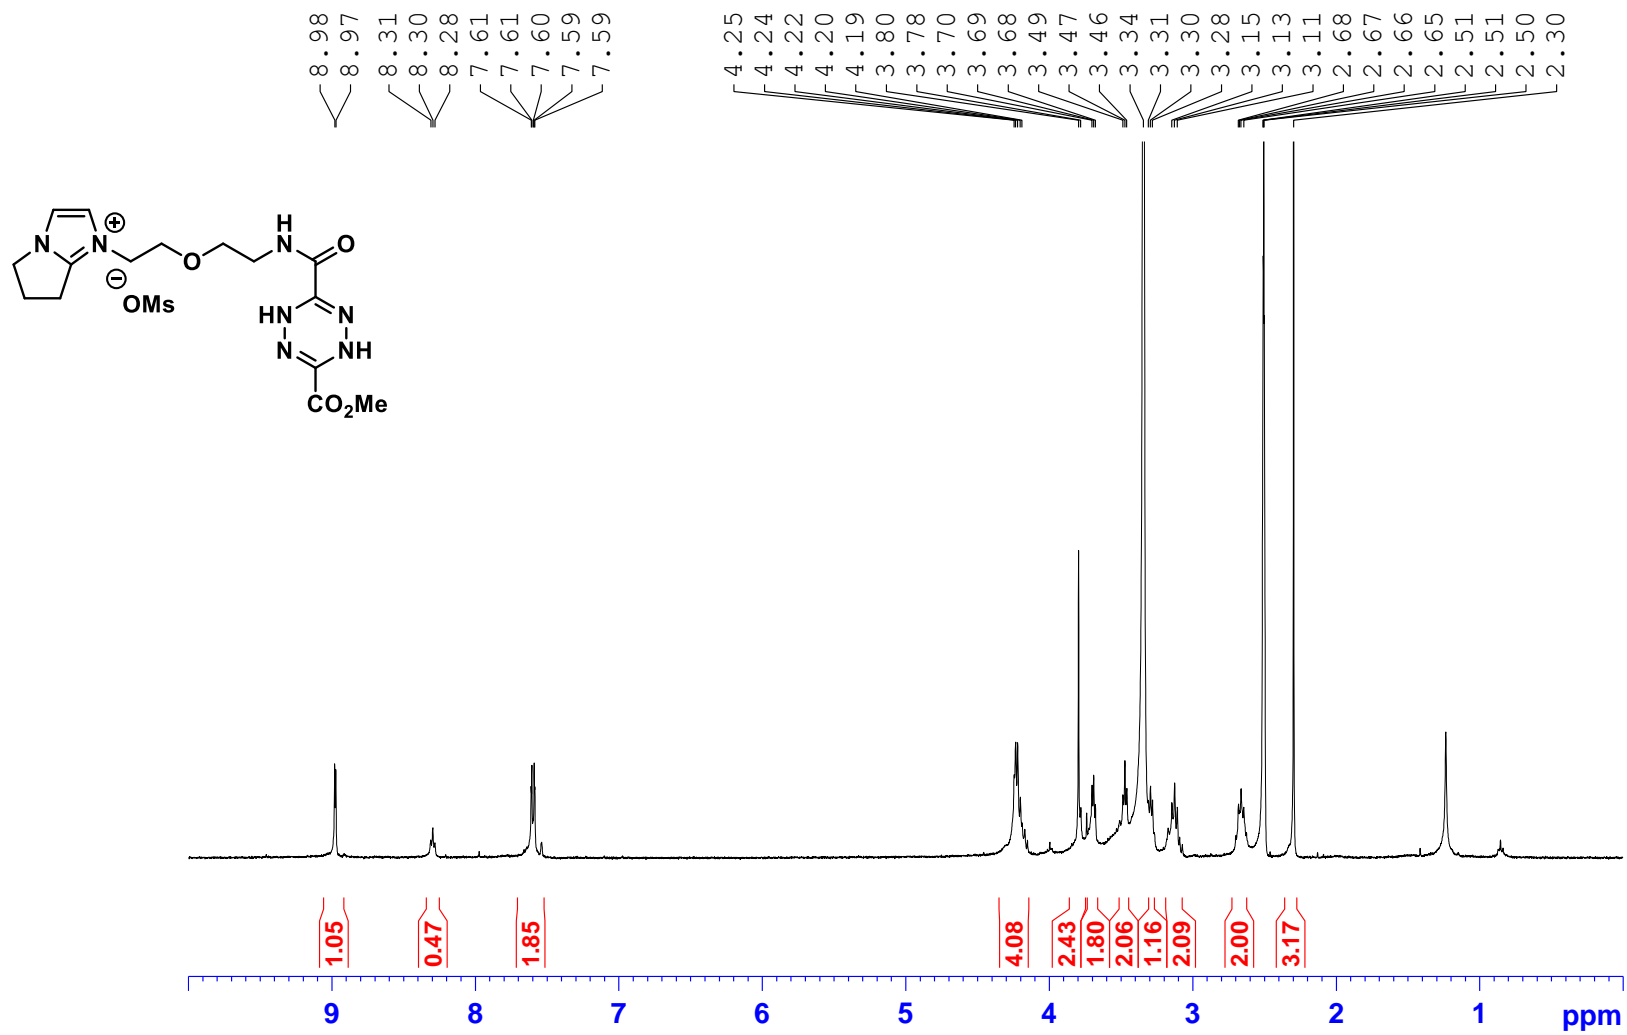



$^{13}\text{C}$  NMR spectrum of [DHTz-3C-im][OMs]

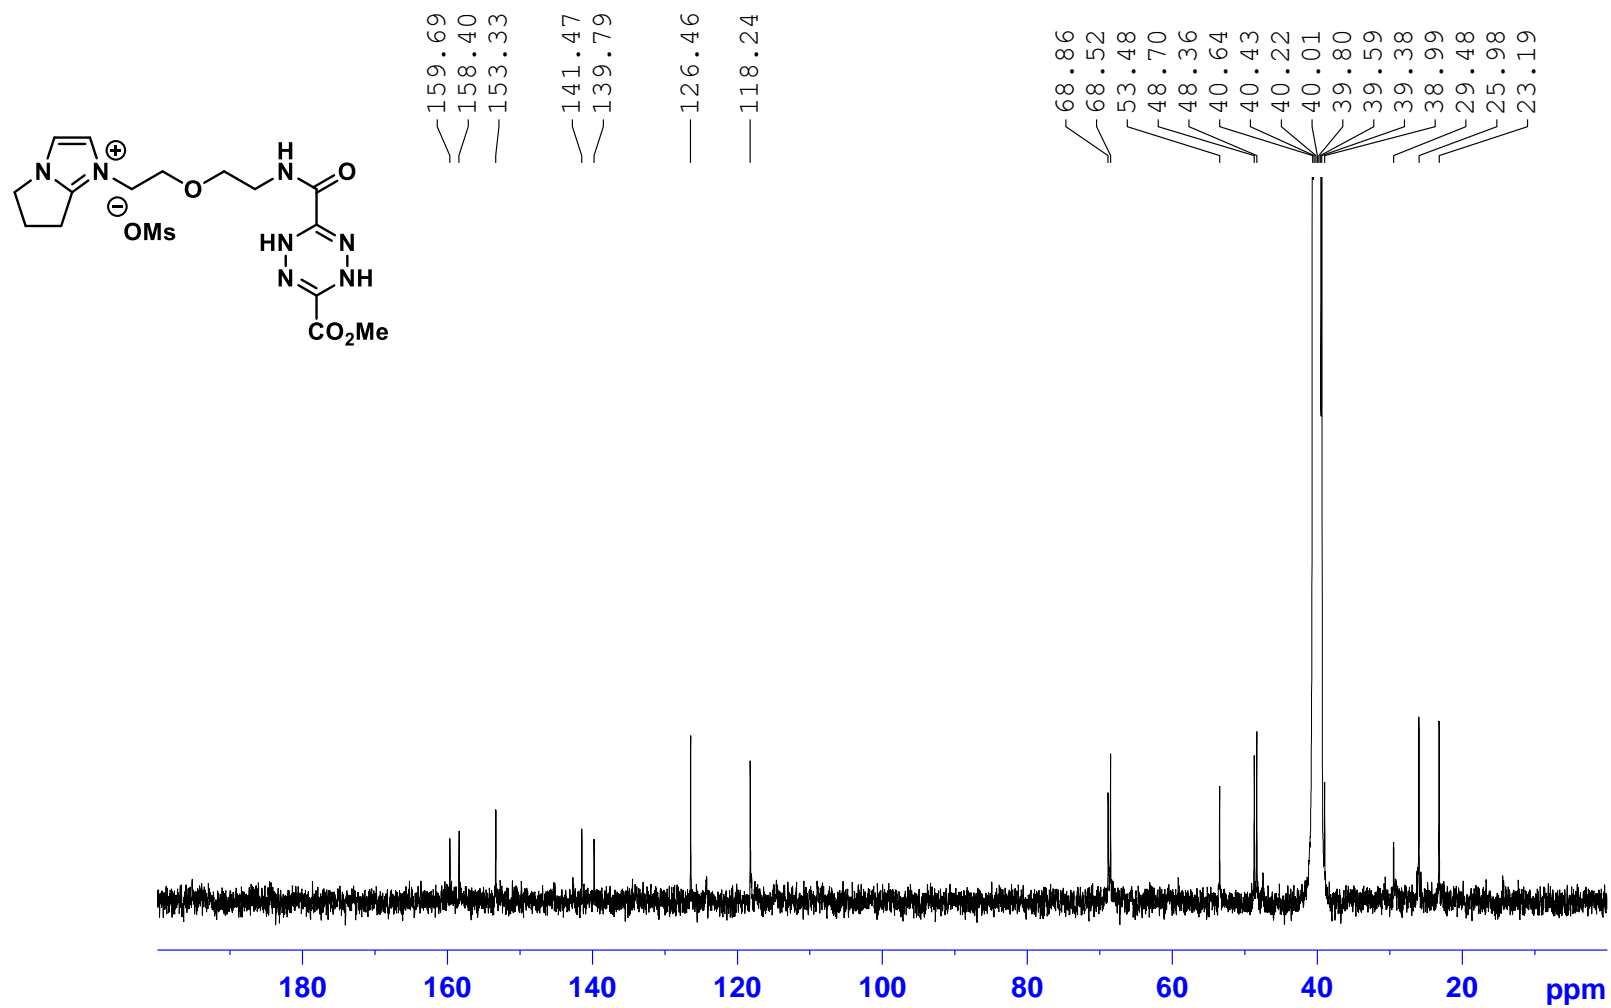

# High-resolution mass spectrum of [DHTz-3C-im][OMs]

Spectrum

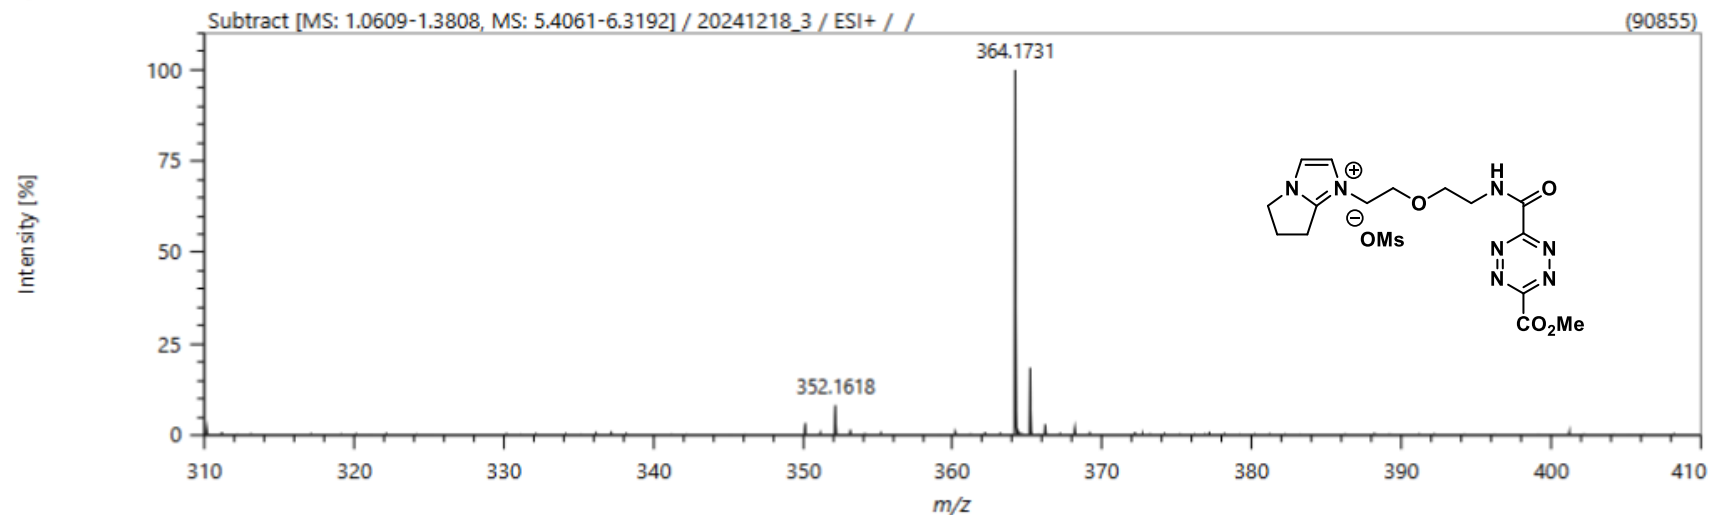

## Elemental Composition

### Parameters

Tolerance:  $\pm 2.00$  ppm  
 Electron: Odd/Even  
 Charge: +1  
 DBE: -99.0 - 999.0

### Elements Set 2:

| Symbol | C   | H    | O | N | S |
|--------|-----|------|---|---|---|
| Min    | 0   | 0    | 4 | 7 | 0 |
| Max    | 400 | 1000 | 7 | 7 | 1 |

## Results

| Mass      | Formula                                                       | Calculated Mass | Mass Difference [mDa] | Mass Difference [ppm] | DBE |
|-----------|---------------------------------------------------------------|-----------------|-----------------------|-----------------------|-----|
| 364.17308 | C <sub>15</sub> H <sub>22</sub> N <sub>7</sub> O <sub>4</sub> | 364.17278       | 0.30                  | 0.83                  | 8.5 |

<sup>1</sup>H NMR spectrum of **TIL**

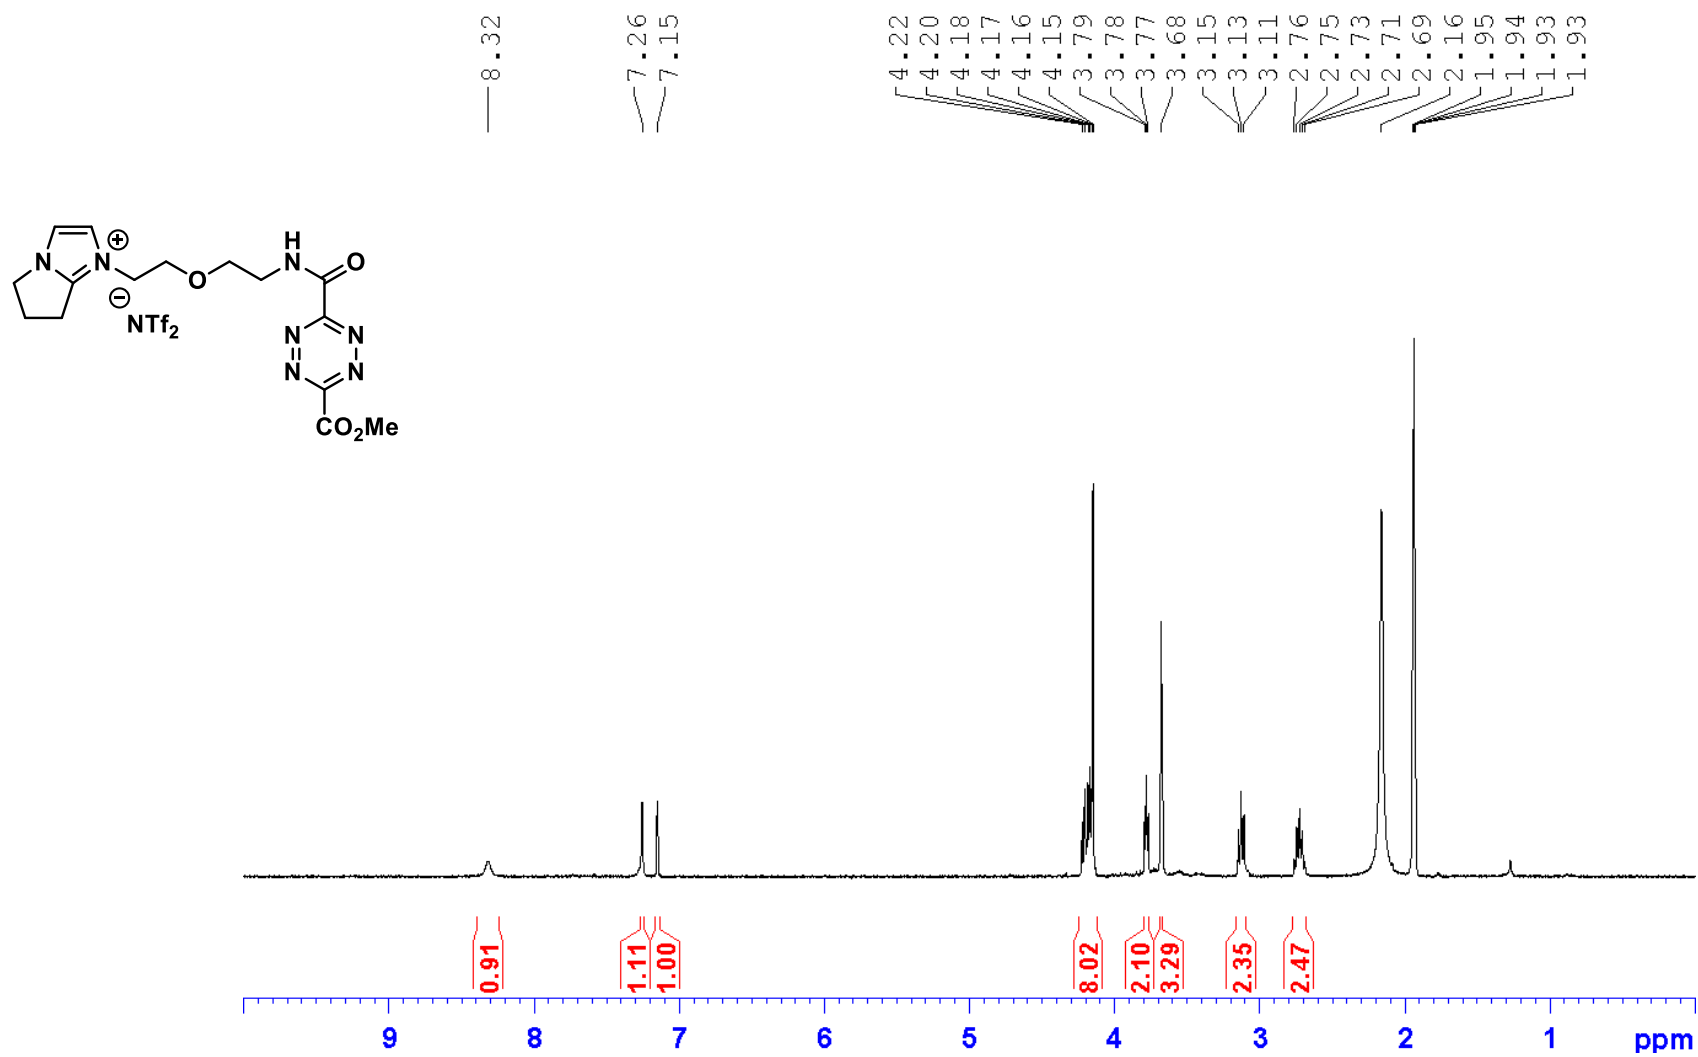

$^{13}\text{C}$  NMR spectrum of **TIL**

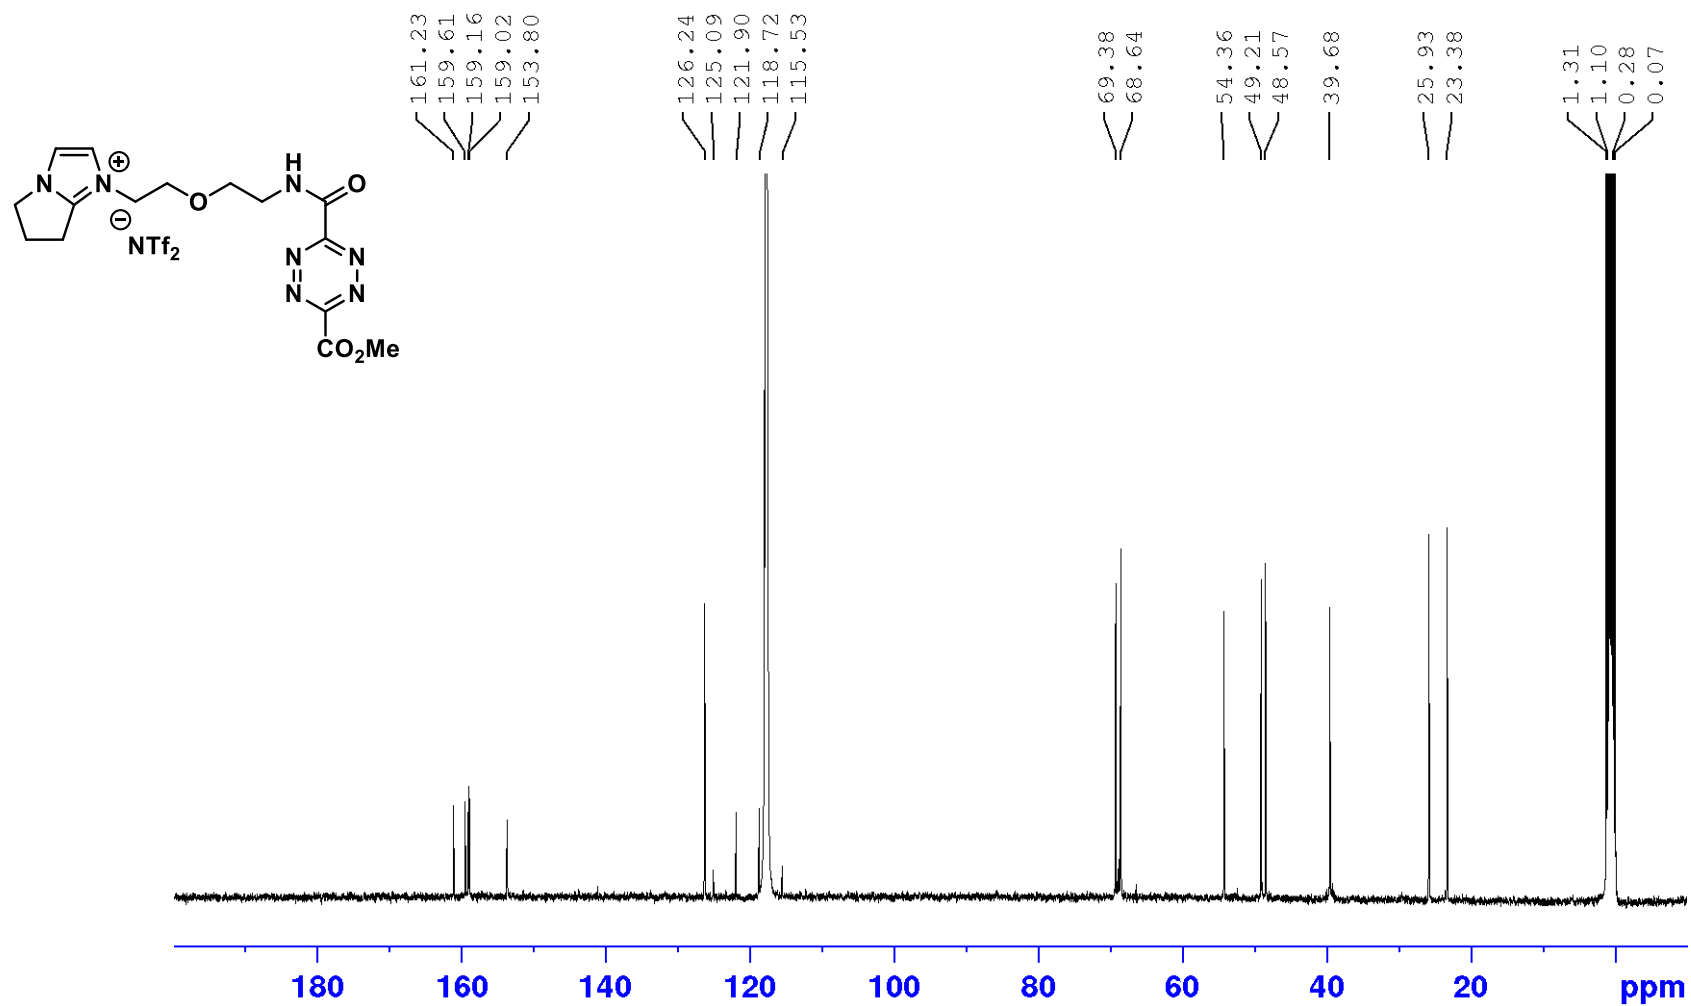

High-resolution mass spectrum of TIL

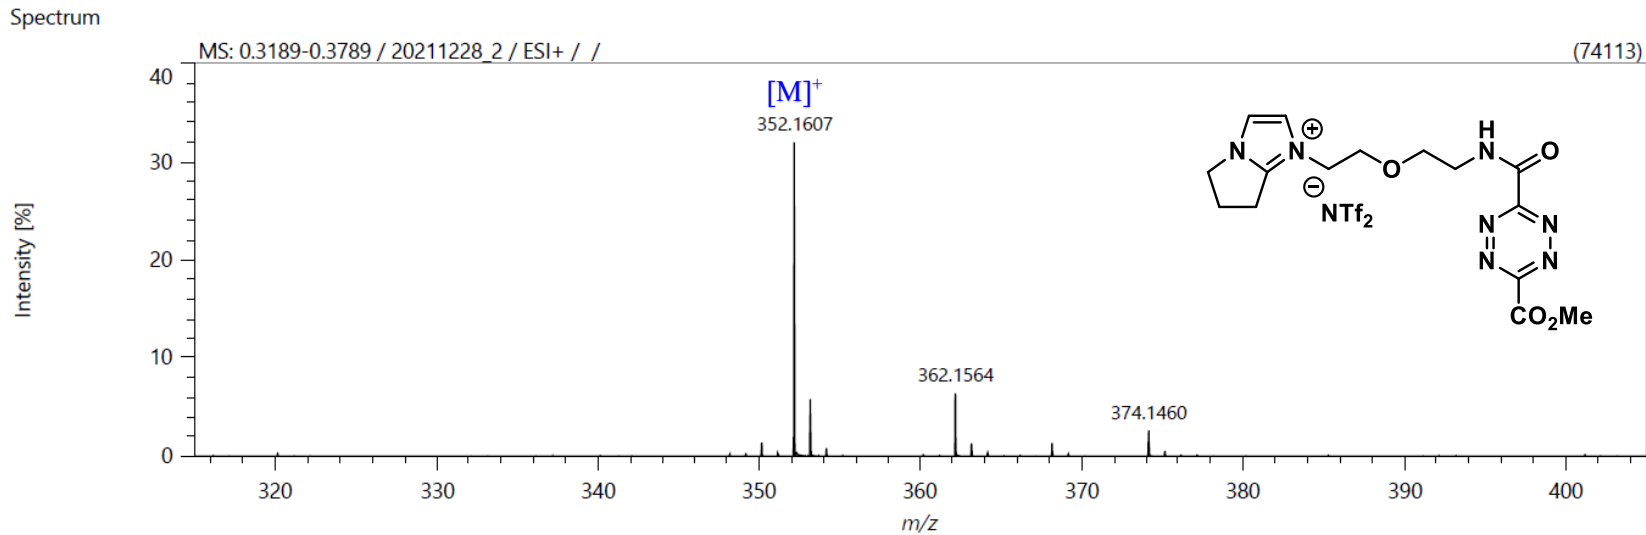

Elemental Composition

| Parameters |               | Elements Set 1: |     |      |   |   |
|------------|---------------|-----------------|-----|------|---|---|
| Tolerance: | ±5.00 ppm     | Symbol          | C   | H    | N | O |
| Electron:  | Odd/Even      | Min             | 0   | 0    | 7 | 4 |
| Charge:    | +1            | Max             | 400 | 1000 | 7 | 4 |
| DBE:       | -99.0 - 999.0 |                 |     |      |   |   |

Results

| Mass      | Formula       | Calculated Mass | Mass Difference [mDa] | Mass Difference [ppm] | DBE |
|-----------|---------------|-----------------|-----------------------|-----------------------|-----|
| 362.15637 | C15 H20 N7 O4 | 362.15713       | -0.76                 | -2.09                 | 9.5 |

(A)

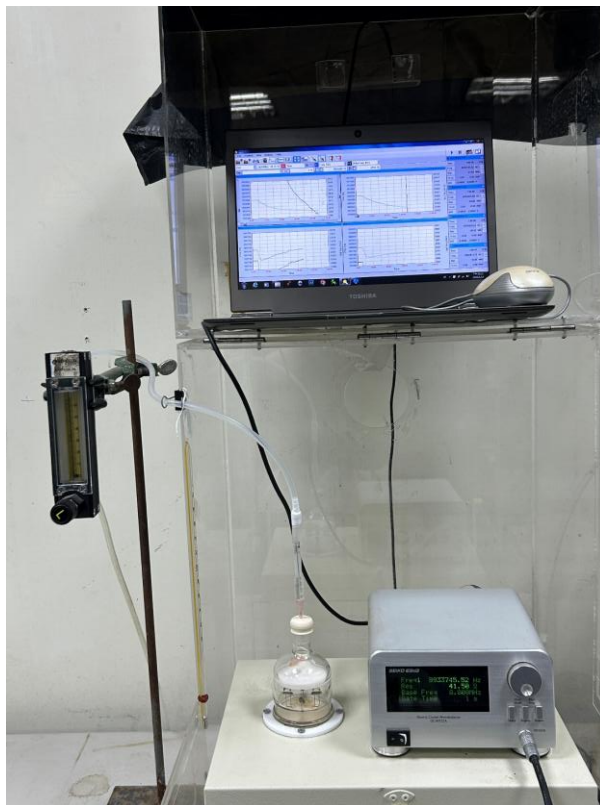

(B)

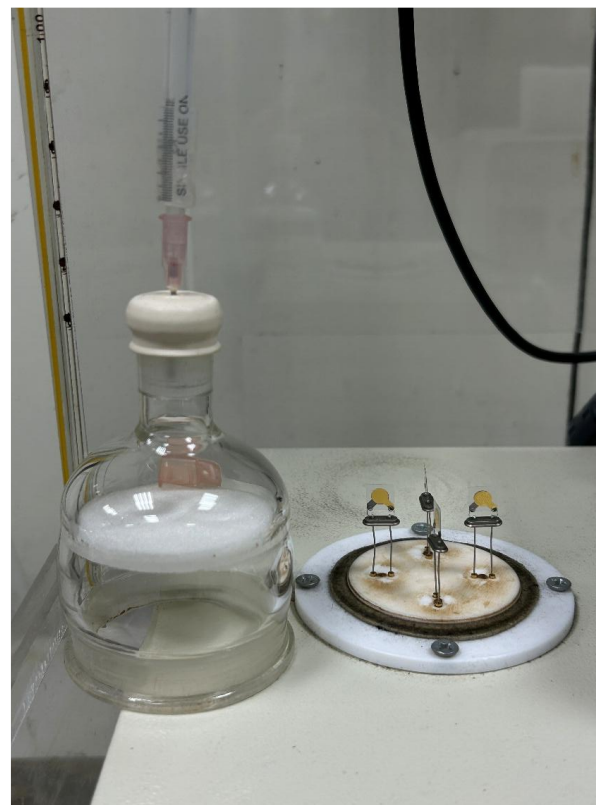

**Fig. S1** (A) Photo of our lab-built **TIL-on-QCM** gas analysis setup and (B) detail of the QCM reaction chamber housed with four quartz sensor chips.

## Spectrum

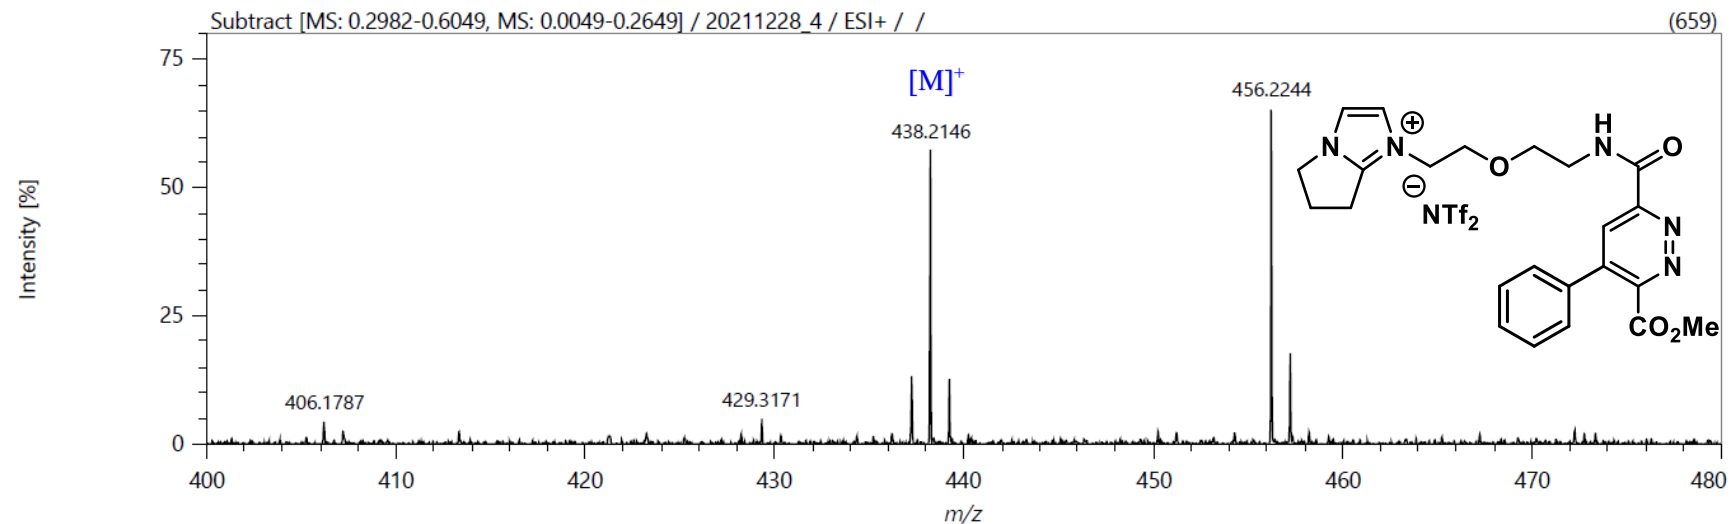

## Elemental Composition

## Parameters

Tolerance:  $\pm 5.00$  ppm

Electron: Odd/Even

Charge: +1

DBE: -99.0 - 999.0

## Elements Set 1:

| Symbol | C   | H    | N | O |
|--------|-----|------|---|---|
| Min    | 0   | 0    | 5 | 4 |
| Max    | 400 | 1000 | 5 | 4 |

## Results

| Mass      | Formula                                                       | Calculated Mass | Mass Difference [mDa] | Mass Difference [ppm] | DBE  |
|-----------|---------------------------------------------------------------|-----------------|-----------------------|-----------------------|------|
| 438.21458 | C <sub>23</sub> H <sub>28</sub> N <sub>5</sub> O <sub>4</sub> | 438.21358       | 1.00                  | 2.29                  | 12.5 |

**Fig. S2** A adduct of **TIL** with styrene isolated from QCM chip.

## **Procedure for QCM measurements**

A Princeton Applied Research QCM922A detector (Oak Ridge, TN, USA) was operated at room temperature and nitrogen was used as carrier gas. The flow rate of the carrier gas was controlled by a Supelco 23324 flowmeter (Merck KGaA, Darmstadt, Germany). The 9 MHz AT-cut quartz chips deposited with gold electrodes (area 11 mm<sup>2</sup>) on both sides were also available from ANT Technology Co. (Taipei, Taiwan). Sample vapors were obtained by gasifying the chemicals in CH<sub>2</sub>Cl<sub>2</sub> in the sealed screw cap septum vials (4 mL). Before use, the gold electrodes on chips were cleaned with NaOH (5 N), water, and HCl to remove organic absorbent impurities. Finally, quartz chips were rinsed with water thoroughly and dried under nitrogen.

The coating solutions were prepared by dissolving individual AIL (1 µL) in acetonitrile (HPLC grade, 300 µL). The freshly prepared solutions (1 µL) were carefully pipetted onto the cleaned bare gold electrode situated at the center of quartz chips. The AIL coated chips were placed in a heating oven (110 °C) for 30 sec to remove residual acetonitrile. The freshly prepared sensor chips were then mounted in the gas flow chamber (100 cm<sup>3</sup>) and used nitrogen as carrier gas at flow rate of 3.0 mL/min. Until a stable baseline was obtained, target gas samples were injected into the chamber. The resonance frequency drops versus time curves were measured in real time and recorded. Typically, the used quartz chips could be readily regenerated by a simple wash with acetonitrile or methanol solvent.



## **Reactions of AIL 1 and AIL 2 toward styrene in CH<sub>3</sub>CN measured by NanoDrop UV-Vis spectrophotometer**

Stock solutions of **AIL 1** (50 mM), **AIL 2** (50 mM) and styrene (500 mM) were prepared by weighing out a portion of pure compound in a microtube and diluting by CH<sub>3</sub>CN. To a microtube containing a portion of **AIL 1** or **AIL 2** stock solution (10  $\mu$ L, 50 mM), then styrene stock solution (10  $\mu$ L, 500 mM) was added and mixed evenly. The progress of click reactions were monitored by NanoDrop 2000 spectrophotometer (Thermo Scientific, Waltham, MA, USA).
